# Supplementary material for: Monogenic Inflammatory Bowel Disease: It's Never Too Late to Make a Diagnosis
Source: PubMed Central journal article supplement (PMC7509434; doi:10.3389/fimmu.2020.01775), 2020-09-04
Supplement: Image_1.pdf [file Image_1.pdf]

# Supplemental Figure 1

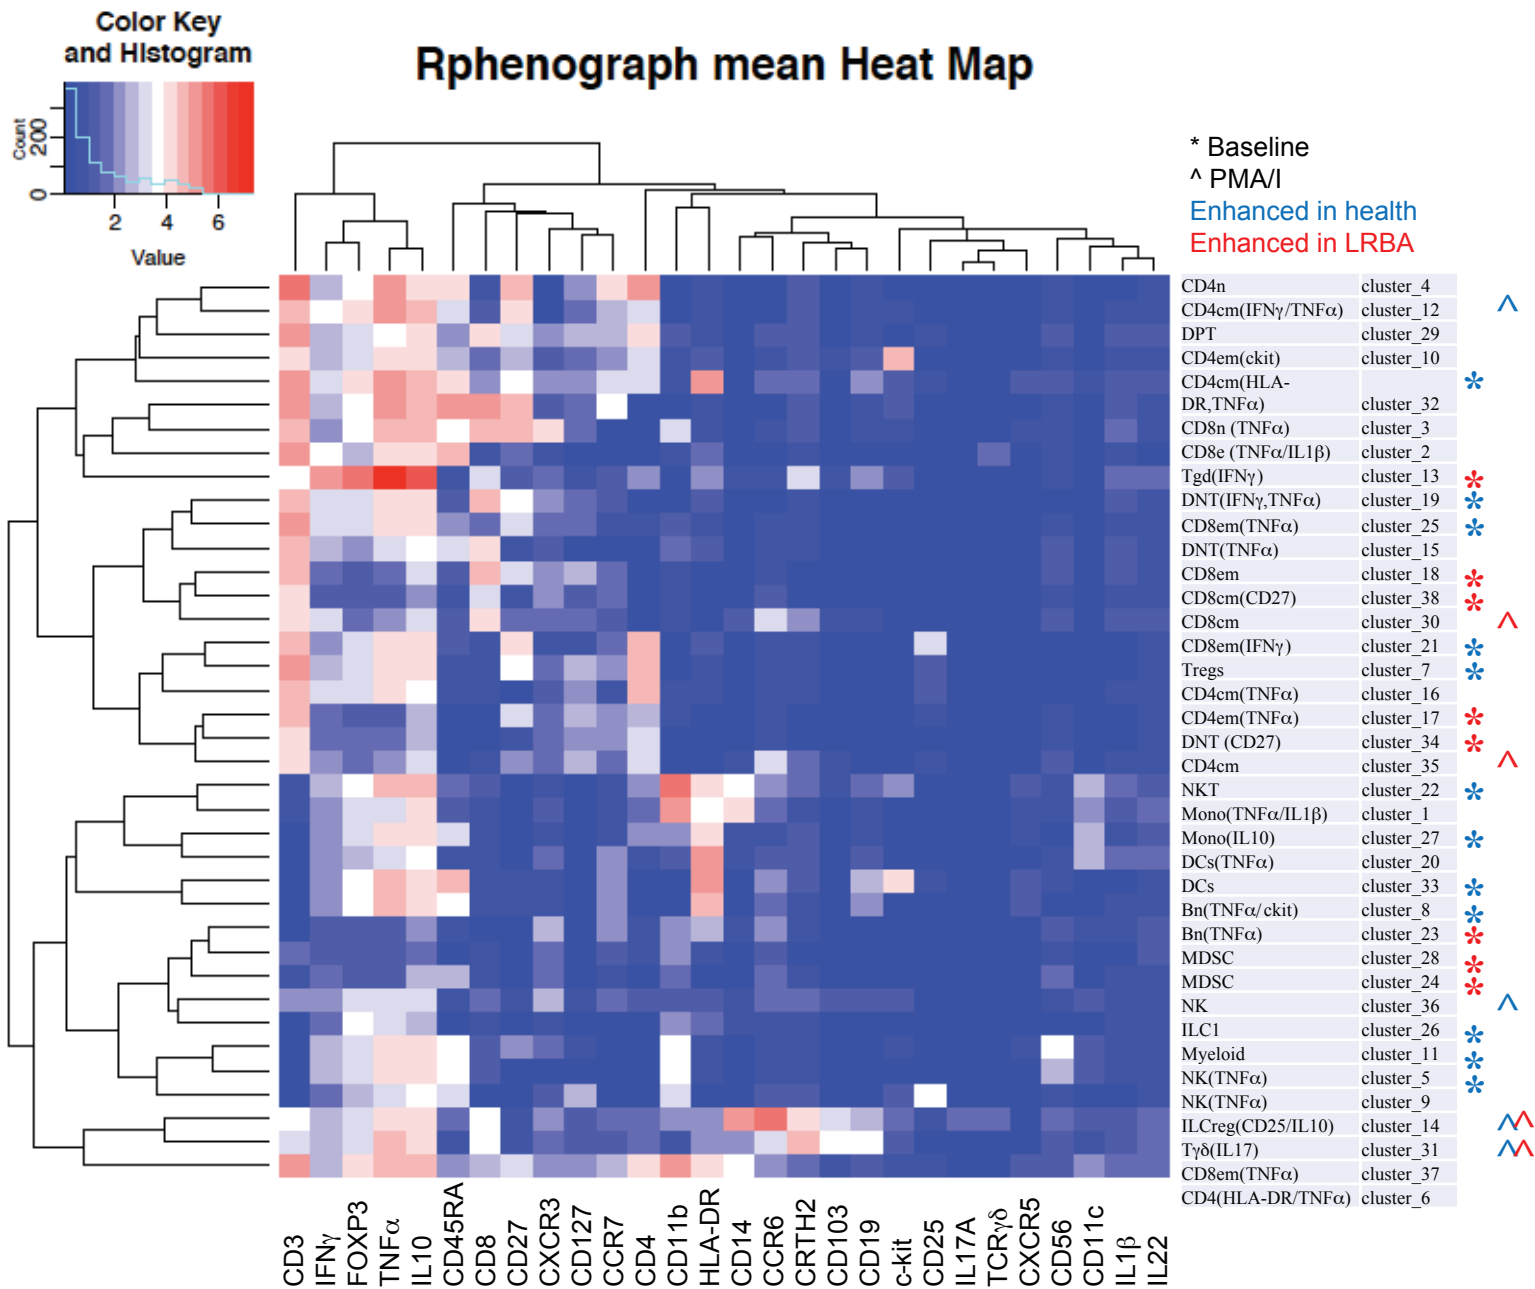

**Supplemental Figure 1: Heat map demonstrating differences in immune landscape between LRBA-deficient patient and controls.** Figure displays heatmap of marker expression under baseline conditions and with PMA/I stimulation in clusters associated with Figure 3B. Clusters enhanced in health are indicated with blue, those enhanced in LRBA are indicated in red. \*represents populations as baseline while ^represents clusters upon PMA/I stimulation.
